1 **Title: STAT4 Phosphorylation of T-helper Cells predicts surgical outcomes in**  
2 **Refractory Chronic Rhinosinusitis**

3 **Running title:** STAT4 predicts success in CRS surgery

4

5 Michael R. Abidin M.D.<sup>1</sup>, Oral Alpan M.D.<sup>2</sup> Matthew Plassmeyer PhD<sup>2</sup>, Lina Kozhaya<sup>3</sup>, Denise  
6 Loizou RN<sup>2</sup>, Mikail Dogan, M.D.<sup>3</sup>, Zachary Upchurch M.D.<sup>1</sup>, Nathan P Manes PhD<sup>4</sup>, Aleksandra  
7 Nita-Lazar, PhD<sup>4</sup>, Derya Unutmaz, M.D.<sup>3</sup>, Søren Ulrik Sønder PhD<sup>2</sup>

8

9 <sup>1</sup>Metropolitan ENT, 6355 Walker Ln, Alexandria, VA-22310, USA

10 <sup>2</sup>Amerimmune LLC, 8260 Greensboro Dr VA-22102 McLean, USA

11 <sup>3</sup>The Jackson Laboratory, Farmington, CT, 06032 USA

12 <sup>4</sup>Functional Cellular Networks Section, Laboratory of Immune System Biology, NIAID, NIH,  
13 USA

14

15 ORCID

16 Michael R. Abidin M.D.<sup>1</sup> 0000-0001-5679-6667

17 Oral Alpan M.D.<sup>2</sup> 0000-0001-7467-8541

18 Matthew Plassmeyer PhD<sup>2</sup> 0000-0001-8068-2125

19 Lina Kozhaya<sup>3</sup> 0000-0002-1559-2278

20 Denise Loizou RN<sup>2</sup>

21 Zachary Upchurch M.D 0009-0001-1357-5765

22 Nathan P Manes PhD<sup>4</sup> 0000-0001-6701-3314

23 Aleksandra Nita-Lazar PhD<sup>4</sup> 0000-0002-8523-605X

24 Mikail Dogan M.D.<sup>3</sup> 0000-0001-8725-9151

25 Derya Unutmaz, M.D.<sup>3</sup> 0000-0001-8898-6633

26 Søren Ulrik Sønder PhD<sup>2</sup> 0000-0002-4697-8421

27 Corresponding Author: Søren Ulrik Sønder,  
28 ssonder@amerimmune.com  
29 571-308-1900

30

31 Previous publication: This paper is uploaded to Medrxiv

32 Keywords: Chronic Refractory Sinusitis, CRS, flow cytometry, T-cells, CD4, STAT4,  
33 phosphorylation, Cohort study

34 **Conflict of interest:** The Author(s) declare(s) that there is no conflict of interest.

35 **Contributions:**

36 Michael R. Abidin: Design, Conduct, Analysis

37 Oral Alpan: Design, Conduct, Analysis

38 Matthew Plassmeyer: Conduct, Analysis

39 Lina Kozhaya: Conduct, Analysis

40 Denise Loizou: Conduct

41 Zachary Upchurch: Conduct

42 Nathan P Manes: Conduct, Analysis

43 Aleksandra Nita-Lazar: Design

44 Mikail Dogan: Conduct, Analysis

45 Derya Unutmaz: Design, Analysis

46 Søren Ulrik Sønder: Design, Conduct, Analysis

47

48 Funding source: This study was supported by Amerimmune. This study was supported in part by

49 the Intramural Research Program of NIAID, NIH and internal funds to D.U. at Jackson

50 Laboratory.

51 **Abstract:**

52 Objective: Chronic rhinosinusitis (CRS) impacts an estimated 5% to 15% of people worldwide,  
53 incurring significant economic healthcare burden. There is a urgent need for the discovery of  
54 predictive biomarkers to improve treatment strategies and outcomes for CRS patients.

55 Study design: Cohort study of CRS patients and healthy controls using blood samples.

56 Setting: Out-patient clinics.

57 Methods: Whole blood samples were collected for flow cytometric analysis. Mechanistic studies  
58 involved the transfection of human primary T cells and Jurkat cells.

59 Results: Our analysis began with a 63-69 year-old female patient diagnosed with refractory  
60 CRS,. Despite undergoing multiple surgeries, she continually faced sinus infections. Whole  
61 exome sequencing pinpointed a heterozygous IL-12Rb1 mutation situated in the linker region  
62 adjacent to the cytokine binding domain. When subjected to IL-12 stimulation, the patient's CD4  
63 T-cells exhibited diminished STAT4 phosphorylation. However, computer modeling or T-cell  
64 lines harboring the same IL-12 receptor mutation did not corroborate the hypothesis that IL-  
65 12Rb could be responsible for the reduced phosphorylation of STAT4 by IL-12 stimulation.

66 Upon expanding our investigation to a broader CRS patient group using the pSTAT4 assay, we  
67 discerned a subset of refractory CRS patients with abnormally low STAT4 phosphorylation.

68 The deficiency showed improvement both in-vitro and in-vivo after exposure to *Latilactobacillus*  
69 *sakei* (aka *Lactobacillus sakei*), an effect at least partially dependent on IL-12.

70 Conclusion: In refractory CRS patients, an identified STAT4 defect correlates with poor clinical  
71 outcomes after sinus surgery, which can be therapeutically targeted by *Latilactobacillus sakei*  
72 treatment. Prospective double-blind placebo-controlled trials are needed to validate our findings.

73

74

## 75 **Introduction**

76 The intricate web of cellular interactions and cytokine signaling pathways plays a pivotal role in  
77 orchestrating the immune response to pathogens. Central to this network is the IL-12/IFN- $\gamma$  axis,  
78 a well-recognized T-helper 1 (Th1) pathway in mediating protective immunity against  
79 intracellular pathogens [1]. Interleukin-12 (IL-12), produced predominantly by antigen-  
80 presenting cells like dendritic cells and macrophages [2], induces the production of interferon-  
81 gamma (IFN- $\gamma$ ) from natural killer cells and T lymphocytes [3,4]. IFN- $\gamma$ , in turn, acts to  
82 stimulate the innate and adaptive arms of the immune system, promoting cellular immunity and  
83 controlling pathogen proliferation. IL12R $\beta$ 1 is a subunit of both the IL-12 and IL-23 receptor  
84 complex and binds to the p40 subunit of IL-12 and IL-23. Upon infection with intracellular  
85 bacteria, phagocytes are activated and secrete cytokines including IL-12, a signature cytokine for  
86 Th1 responses. Following binding of IL-12 to its receptor, STAT4 is phosphorylated which is  
87 essential for IFN $\gamma$  production[1,5,6].

88

89 Disruption of this axis could compromise the ability of the immune system to handle microbial  
90 challenges, leading to persistent infections and prolonged inflammation. Indeed, a balanced IL-  
91 12/IFN- $\gamma$  response is essential to clear pathogens, maintain mucosal homeostasis, and prevent  
92 tissue damage in the sinuses[1]. Furthermore, recurrent infections, which denote a failure of the  
93 immune system to provide lasting protection after initial exposure to a pathogen, may also be  
94 linked to perturbations in the IL-12/IFN- $\gamma$  pathway. An impaired or inadequate IL-12-driven  
95 IFN- $\gamma$  response may not only decrease resistance to primary infections but might also reduce  
96 immune memory, rendering individuals more susceptible to recurrent bouts of infections despite

97 adequate surgical intervention [1,7–13]. Although T-cell defects are the most common immune  
98 disorder in chronic rhinosinusitis (CRS), clinical workup towards its identification is rarely  
99 performed.

100

101 Various dietary supplements have been demonstrated to enhance Th1 responses. Among them  
102 included are various lactobacillus probiotic supplements. Although the role of lactobacillus  
103 containing supplements, taken orally or topically, is unproven in patients with CRS, small sized  
104 studies and anecdotal reports did find correlations with clinical outcomes in the surgical healing  
105 process [14–20]. Data from preliminary studies have shown mixed results in patients receiving  
106 probiotics containing lactobacilli species. Lactobacilli have the potential of inducing IL-12 from  
107 macrophages [21–23].

108

109 Our investigation began with a case of refractory chronic rhinosinusitis (RCRS) associated with  
110 a heterozygous IL-12 receptor mutation. Despite observing decreased STAT4 phosphorylation in  
111 response to IL-12 stimulation in both the patient and her children, the mutation itself was not  
112 proven to be the cause. Further research revealed this decreased phosphorylation to be a common  
113 characteristic in a broader RCRS patient cohort. Insights into the IL-12/IFN- $\gamma$  signaling  
114 pathway's role in CRS may unveil new therapeutic targets to enhance immunity, alleviate  
115 chronic inflammation, and decrease recurrent infections.

116

## 117 **Materials and Methods:**

### 118 **Patients and ethical statement.**

119 The studies involving human participants were reviewed and approved by Western Institutional  
120 Review Board (WIRB) Protocol #1285028. Written, informed consent was obtained from the  
121 individuals for the publication of any potentially identifiable images or data included in this  
122 article. Individuals undergoing steroid or MoAB treatments targeting the IL-12 pathway were  
123 excluded from the study. The grouping of CRS and RCRS patient was done according to  
124 published guidelines[24,25].

125 Lactobacilli supplements and administration: *Lactobasillus sakei* proBio65 as a nasal rinse 1/4<sup>th</sup>  
126 teaspoon of Lanto Health powder (240 mg) in 2 tablespoons of normal saline nasal rinses once a  
127 day and 240 mg twice a day in food.

128 Genetics: Whole Exome Sequencing was carried out by GeneDX (Gaithersburg, MD).

129 Subsequently Sanger sequencing was carried out by MacroGen (Rockville, MD).

130

### 131 **Flow cytometry and cell culture.**

132 Staining for IL-12R $\beta$ 1 expression was performed using antibodies against IL-12R $\beta$ 1, CD4,  
133 CD20 and CD3. For the Th1 & Th17 assay PBMC were isolated by gradient centrifugation. The  
134 percentages of CD4 T-cells capable of producing IFN $\gamma$  (Th1 cells) and IL-17 (Th17 cells) were  
135 measured by stimulating the PBMC with PMA (50ng/ml) and ionomycin (1 $\mu$ g/ml) in the  
136 presence of brefeldin A for 4 hours. The cells were then permeabilized and stained with  
137 antibodies against CD3, CD4, CD8, CD45RA, CCR6, IFN $\gamma$ -APC and IL17-PE (BD Bioscience,  
138 San Jose, CA). Acquisition was set to 30000 CD3<sup>+</sup> events. The Th1 mediated IFN $\gamma$  response was  
139 studied by incubating the PBMC for 72 hours in the presents of IL-2 (100 U/ml), IL-12 (100  
140 ng/ml), IL-18 (50 ng/ml), and Dynabeads Human T-Activator CD3/CD28 (10 $\mu$ l/ml). The cells  
141 were then fixed, permeabilized and stained with antibodies against CD3, CD45RO, CD4, IFN $\gamma$

142 and fixable viability dye 780. Acquisition was set to 20000 CD4<sup>+</sup> events. The CAP and CLIA  
143 validated pSTAT4 stimulation assays were carried out using whole blood stimulated with IL-12  
144 (100ng/ml) for various timepoints, followed by staining with antibodies against CD3, CD4,  
145 CD45RO, and pSTAT4(pY693) (BD Bioscience, San Jose, CA). Acquisition was set to 20000  
146 CD4<sup>+</sup> events with a LLOQ of 2500[26]. All samples were acquired on a 3 laser/10 color BD  
147 FACSCanto. The instrument has been CAP (College of American Pathologists) and CLIA  
148 validated for clinical diagnostic studies. The individual antibody concentrations were optimized  
149 for maximum separation of the populations[27].

150

151 One capsule of Super 8 HI-Potency Probiotic from Flora containing *L. acidophilus*, *L.*  
152 *rhamnosus*, *L. salivarius*, *L. plantarum*, *L. casei*, *B. bifidum* and *B. longum* was resuspended in  
153 PBS and a total of 10<sup>6</sup> cells were added to 10<sup>6</sup> PBMC in the presence or absence of IL-12  
154 neutralizing antibodies (BioRad) and incubated for 18 hours at 37°C. Control samples were  
155 stimulated with IL-12 for 2 hours. The experiment was done six times and representative plots  
156 are shown. The percentage reduction in pSTAT4 phosphorylation was calculated using the  
157 CD45RO<sup>+</sup>/pSTAT4<sup>+</sup> value as  $((\text{IL12AB+lactobacilli})-(\text{unstimulated})) * 100 / ((\text{lactobacilli})-$   
158  $(\text{unstimulated}))$

159

## 160 **Data analysis and modelling.**

161 Data analysis of flow cytometry data was performed using FCS Express software (De Novo  
162 software, Glendale, CA). All data comparisons were analyzed as paired, two tailed, two-sample  
163 unequal variance using Student's t-test to determine significance. A p-value less than 0.05 was  
164 considered significant, \* p<0.05, \*\* p<0.01.



165

166 Protein structure modeling was performed using AlphaFold [28]. The resulting models were  
167 aligned and visualized using Chimera[29].

168

### 169 **Plasmid constructs**

170 Human codon-optimized wild-type IL-12Rb1 and IL-12Rb2 protein sequences were synthesized  
171 by MolecularCloud (HG11674-UT and HG10145-UT, respectively) and then cloned into  
172 lentiviral plasmid constructs with RFP and GFP reporters, respectively. The overlap extension  
173 PCR method was used to generate the mutant IL12Rb1 Q238E protein sequence and clone it into  
174 the lentivector. IL-12Rb1 Q238E sequence was then confirmed using sequencing by Eton Bio.  
175 Primer sequences are available upon request.

176

### 177 **Lentivirus production**

178 The lentiviruses pseudotyped with vesicular stomatitis virus G protein envelope were generated  
179 with HEK293T cells using Lipofectamine 3000 (Invitrogen) according to the manufacturer's  
180 protocol as previously described [30].

181

### 182 **Engineering primary human T cells and Jurkat cells**

183 Healthy adult blood was obtained from AllCells. Primary CD4 T cells were isolated, activated,  
184 transduced to overexpress IL12Rb1 wild-type or mutant, and proliferated as previously described  
185 [31]. Total PBMC were activated with antiCD3/anti-CD28 dynabeads (Invitrogen) and expanded  
186 in IL-2 (10ng/ml) containing media. To generate IL12Rb1 wild-type or mutant and IL12Rb2  
187 overexpressing Jurkat cells, wild-type Jurkats were transduced with the IL-12Rb2 lentiviruses,

188 co-expressing GFP marker, and superinfected with IL-12Rb1 wild-type or IL-12Rb1 Q238E  
189 lentiviruses, co-expressing RFP marker, at MOI=3. The infection levels were determined by GFP  
190 or RFP expression using flow cytometry analysis. Engineered Jurkat cells were later single-cell  
191 cloned with FACS Aria Fusion (BD Biosciences). To further confirm IL-12 receptors  
192 overexpression, transduced cells were stained with IL-12Rb1 (R&D) and IL-12Rb2 (Biolegend)  
193 antibodies. For phospho-Stat4 staining, total resting or activated PBMCs, engineered primary  
194 CD4 T or Jurkat cells were stimulated with different concentrations of IL-12 (R&D) for 90  
195 minutes. Cells were collected, stained with fixable viability dye (eBiosciences) and surface  
196 markers including IL-12Rb1 (R&D biosystems), CD3, CD4 and CD8 (Biolegend) to identify  
197 PBMC populations, washed then fixed with Cytofix buffer (BD) prewarmed to 37°C for 10 min.  
198 After spinning down, the cells were permeabilized with ice-cold Phosflow Perm buffer III (BD)  
199 on ice for 30 min and were stained with phospho-Stat4 (pY693) antibody (BD) or total Stat4  
200 primary antibody followed by anti-rabbit secondary antibody (both from Invitrogen). Stained  
201 cells were analyzed on BD Symphony A5 flow cytometer (BD Biosciences). Flow cytometry  
202 data was analyzed using FlowJo software.

203

204

## 205 **Statistical Analyses and Reproducibility**

206 All statistical analyses were performed, and graphs were prepared using GraphPad Prism V9  
207 software. Each experiment was performed at least three times and non-parametric t-tests were  
208 used for statistical significance analyses.

209

## 210 **Results**

211 **Identification of a Th1 defect in a family of patients with RCRS.**

212 The patient is a 63-69 year-old Caucasian female with a long-standing history of chronic  
213 pansinusitis without polyps, and osteomyelitis of the right maxillary sinus wall. Sinus cultures  
214 grew methicillin resistant *S. aureus* and *Klebsiella* species on multiple occasions. Patients  
215 underwent multiple sinus surgeries and procedures involving ethmoid, maxillary and frontal  
216 sinuses. Sinus surgical pathology results show predominantly neutrophilic infiltrates (Figure 1A).  
217 The patient's immune evaluation showed slight hypogammaglobulinemia (400-500 mg/dL  
218 range) on multiple occasions along with poor responses to *S. pneumoniae* serotypes (3/14 of the  
219 serotypes with protective levels above 1.3 mcg/ml despite multiple boosters with Pneumovax23).  
220 Serum IgM, IgA and IgE levels were within normal limits. The patient's B cells expressed  
221 normal CD27, IgG, IgA, IgM and IgD, arguing against a primary antibody deficiency disorder.  
222 T-cells, including T-cell subsets and NK cells were normal for absolute numbers and  
223 percentages. Given the poor response to antibiotic therapies, and persistently borderline low IgG,  
224 the patient was started on IgG replacement therapy which resulted in partial clinical  
225 improvement of the sinus disease.

226  
227 Since the patient's clinical presentation was not fully explained by the low serum IgG and only a  
228 partial clinical response to the IgG replacement therapy, whole exome sequencing was  
229 performed, which revealed a heterozygous mutation in the *IL12RB1* gene, 712 C>G resulting in  
230 the p.Gln238Glu variant. The variance was confirmed by Sanger sequencing in the patient as  
231 well as in four of her five children (Figure 1B+1C). The p.Gln238Glu variant is classified as a  
232 variant of uncertain significance (VUS) in ClinVar[32]. The structure modeling of the molecular  
233 defect maps it to the linker region to the cytokine binding domain (Supplemental figure 1). The

234 mutation did not affect the expression level of IL12Rb1 receptor on the cell surface or the ability  
235 of CD4 cells to produce IL-17 or IFN $\gamma$  in response to general activation by PMA plus ionomycin  
236 (Figure 1D and Figure 2). We then hypothesized that it could be possible for the mutated  
237 receptor to still form complexes with the IL23R or IL-12R $\beta$ 2 but not bind IL-12 or IL-23 in a  
238 conformation that activates downstream signaling. The patient's RCRS history led us to focus on  
239 IL-12/Th1 rather than IL-23/Th17 defects. To assess the potential role of the *IL12R $\beta$ 1* mutation  
240 on IL-12 signaling, we measured IFN $\gamma$  production by stimulating PBMC from the patient and  
241 healthy age matched controls after IL12R $\beta$ 1 specific stimulation. The expected result for a  
242 heterozygous patient would be a reduction rather than abolishing IL-12 signaling. The results  
243 show that the percentages of the CD4<sup>+</sup> T cells that are IFN $\gamma$ <sup>+</sup> after stimulation are 4.6% for the  
244 healthy control versus 5.2% for the patient. However, only 0.5% of the patient's CD4<sup>+</sup> T-cells  
245 are IFN $\gamma$ <sup>high</sup> compared to 2.8% in the healthy control (Figure 3).

246

247 To identify the Th1 defect, we measured the phosphorylation of STAT4 in response to IL-12  
248 stimulation in CD3<sup>+</sup>/CD4<sup>+</sup>/CD45RO<sup>+</sup> cells at various time points between 0 and 5 hours. The  
249 result for the patient is an average of three samples each collected a month apart. They were  
250 compared to a group of age matched healthy controls (n=5) and patients with various well  
251 defined immune deficiencies requiring antibody replacement therapy (n=5). Healthy controls  
252 showed an increase in percentage of p-STAT4 positive T-helper memory cells after 30 minutes  
253 of stimulation with IL-12 which peaked after 60-120 minutes followed by a slow decrease after  
254 180 minutes. The patient's p-STAT4 response was significantly blunted at all time points.  
255 (Figure 4A and 4B).

256

257 We subsequently tested four of the patient's adult children. The IL-12 induced STAT4  
258 phosphorylation showed that the three siblings with the mutation showed a lower peak in STAT4  
259 phosphorylation after 60 minutes compared to the sibling without the mutation (Figure 4C). One  
260 of the three siblings with the mutation had a history of recurrent sinusitis and pneumonia.

261

### 262 **Transfection Experiments to show the impact of Q2883 mutation on primary T cells.**

263 The modeling of the IL12 receptor did not show any difference in the folding of the receptor  
264 between the wild type and the p.Gln238Glu variant (Supplemental Figure 1). To determine  
265 whether the mutated IL12 receptor is the cause of the defective STAT4 phosphorylation, we first  
266 engineered primary CD4<sup>+</sup> T cells to overexpress the WT or the mutated IL-12Rb1 (Supplemental  
267 Figure 2). We saw no difference in the phosphorylation of STAT4 on IL12 stimulation in these  
268 primary CD4<sup>+</sup> T cells when compared those engineered to express wild-type or mutant IL12Rb1.  
269 (Supplemental Figure 3). A significant challenge posed by this system is the mosaicism of the  
270 cells harboring the mutant receptors, as they also express normal IL12b1 receptors constitutively.  
271 Consequently, IL12 may exhibit a preferential activation of the normal receptor, complicating  
272 the functional analysis of the mutant variant. To address this issue, we utilized Jurkat cells,  
273 which are deficient in IL12b1. Jurkat cells also express high levels of STAT4 constitutively  
274 (Figure 5). Thus, we genetically expressed either the wild-type (WT) or the mutant variant of  
275 this receptor in Jurkat cells along with the IL-12Rb2, which is required to form heterodimer with  
276 IL-12Rb1 for the signaling via IL-12 (Supplemental Figure 4). In these genetically engineered  
277 Jurkat cells, upon stimulation with IL-12 we could detect phosphorylation of STAT4, but not  
278 wild type Jurkat line, suggesting efficient reconstitution of the receptor complex for this  
279 signaling pathway. Overexpression of IL12Rb1 and IL12Rb2 genes also led to high level

280 expression of these receptors on cell surface of the Jurkat cells and was comparable between the  
281 mutant and the WT IL-12Rb1 expressing cells (Figure 6A). Upon stimulation of with IL-12,  
282 there was no difference for STAT4 phosphorylation between the Jurkat cells expressing WT or  
283 the mutant IL12Rb1 (Figure 6B). As we couldn't establish a conclusive link between the  
284 patient's mutation and the signaling defect, we opted to examine a larger number of individual  
285 clones.

286  
287 We therefore asked if there factors other than IL-12R and STAT4 expression could potentially  
288 affect the IL-12 signaling. We reasoned such differences could only be detected at single cell  
289 clone levels. Accordingly, Jurkat cells engineered to overexpress WT IL-12Rb2 and WT IL-  
290 12Rb1 were single cell sorted based on GFP and RFP expression, single cell clones were  
291 expanded for 3-4 weeks and pStat4 levels in different clones were measured after IL-12  
292 stimulation. Remarkably, while the IL-12 receptor levels were high and comparable among all  
293 clones (over 40 clones were analyzed), pSTAT4 levels were widely different between clones  
294 stimulated with IL-12 (Figure 7A). These results suggest that yet to be determined intermediary  
295 factors between the receptor and STAT phosphorylation, for example kinases such as Tyk2 or  
296 Jak2, may influence the efficiency, which could explain the results observed in the family  
297 reported in this article (Figure 7B).

298

299

### 300 **Validation of the pSTAT4 assay**

301 In the context of CRS, dysbiosis in the upper airway microbiome can influence IL12 signaling.  
302 For example, mucin-fermenting bacteria in CRS may degrade and ferment mucins, altering the

303 airway environment and promoting inflammation that could disrupt IL12 signaling [33].

304 Additionally, elevated short chain fatty acid levels in CRS mucus may also impact this pathway  
305 [34]. This suggests that apart from genetic factors, extrinsic factors, such as microbial  
306 imbalances could contribute to IL12 signaling defects in CRS.

307 To test this hypothesis, we next sought to test a larger cohort of patients with RCRS, to see if the  
308 variability we see in the pSTAT4 levels in the clones is reflected between patients. The  
309 phosphorylation of STAT4 after IL-12 stimulation allows for a functional readout of the  
310 signaling regardless of the location of the genetic variations in the IL-12/IFN $\gamma$  axis or molecules  
311 that influence it, which can vary between patients. To do this, we first validated the assay so that  
312 the results are consistent and that it can be included in the clinical workup of patients with CRS.  
313 The previously published pSTAT4 assay, used to study IL-12 receptor mutations, relied on the  
314 hypothetical approach of maximizing IL-12 receptor expression by inducing blastogenesis using  
315 PHA, a process that typically takes 5-7 days. The blasts are then subsequently stimulated with  
316 IL-12 [35–37]. This approach can be employed in a research setting to demonstrate that IL-12  
317 receptor mutations can disrupt IL-12 signaling. However, it is not well-suited for routine clinical  
318 testing due to the challenges associated with validating a multistep process that involves  
319 numerous variables in blastogenesis. Additionally, blasts may not accurately reflect a  
320 physiological response in vivo, as the majority of circulating cells are not in a continuous  
321 activated state. Furthermore, our findings indicate that the expression of T cell surface IL-12  
322 receptors remains unchanged between resting T cells and blasts. (Supplemental Figure 5). The  
323 pSTAT4 assay performed on resting primary T cells and validated under CAP/CLIA utilizes  
324 whole blood within 24 hours [26]. The assay measures STAT4 phosphorylation at multiple time  
325 points, extending up to 2 hours, and can be finalized within 5 hours. It exhibits high

326 reproducibility and is accompanied by reference ranges, enabling us to assess a patient's  
327 condition without the need to include a group of healthy controls.

328

329 **pSTAT4 to screen CRS for prolonged surgical recovery.**

330 In addition to the results from our Jurkat clones showing variability in STAT4 phosphorylation,  
331 the published reports on T cell defects in up to 56% of RCRS patients supported our approach to  
332 screen a larger cohort of RCRS patients [38]. To assess the clinical relevance of our finding in  
333 the larger RCRS population, we used the IL-12 induced pSTAT4 as a screening assay in 147  
334 RCRS patients requiring surgery (Figure 8 and Supplemental Figure 6). These RCRS patients  
335 presented with infections of *Klebsiella*, *Staphylococcus*, *Serratia* and *Burkholderia* species  
336 isolated from sinus cultures, and had history of multiple sinus procedures, no polyps. These  
337 patient's nasal mucosa showed areas of inflammation, often with one side or another showing  
338 much worse disease, rather than widespread inflammation. Chronic inflammatory infiltrates were  
339 common to all RCRS patients' tissue specimens, performed as a part of their post-surgical  
340 specimen processing. Bad surgical outcome was defined as requiring more than two courses of  
341 antibiotic therapy within the first 6 months after surgery. Low STAT4 phosphorylation  
342 correlated with prolonged surgical recovery of lengthy healing process as well as persistence of  
343 the sinus infections. None of the individuals in the control group or the patients with a good  
344 surgical outcome had a pSTAT4 value below 5% whereas most of the patients with poor surgical  
345 outcome had a value below 5%. To test if a soluble factor (i.e. anti-cytokine antibody) was  
346 responsible for low STAT4 phosphorylation, we performed the experiments on health subjects  
347 CD4 T cells using RCRS patient serum. Serum of RCRS patients with low pSTAT4 did not



348 result in healthy patients' cells down-regulating STAT4 phosphorylation in response to IL-12  
349 stimulation (Supplemental figure 7).

350

### 351 **Effect of Lactobacilli on STAT4 phosphorylation in-vitro and in vivo**

352 In our follow-up experiments, we explored the potential impact of lactobacilli on pSTAT4  
353 phosphorylation. This investigation was prompted by data suggesting that specific lactobacilli  
354 strains can trigger IL-12 production in macrophages and by anecdotal observations within our  
355 group regarding the potential clinical advantages of probiotics in chronic sinus disease. Our  
356 results demonstrated that when PBMCs were exposed to a lactobacilli solution containing *L.*  
357 *acidophilus* for 18 hours, STAT4 phosphorylation was induced, even in the absence of  
358 exogenous IL-12 supplementation. Intriguingly, when the lactobacilli solution was introduced to  
359 PBMCs of patients exhibiting low STAT4 phosphorylation in their CD4 T-cells, there was a  
360 notable enhancement in STAT4 phosphorylation. This effect was partially inhibited by  
361 neutralizing anti-IL12 antibodies (Figure 9). This suggests that the probiotic's effect can be  
362 attributed to IL12 production but contributions from an IL-12 independent pathway could not be  
363 ruled out. The phosphorylation of STAT4 by lactobacilli, as well as its inhibition of IL-12,  
364 exhibits specificity to both the bacterial strain and the host (Supplemental Figure 8).

365

366 In light of these findings, we conducted a retrospective review of medical records for 25 CRS  
367 patients who were administered *Latilactobacillus sakei*, a strain reported for its ability to induce  
368 exceptionally high IL-12 levels [39]. We gauged the patients' response to the probiotic by  
369 correlating the number of postoperative office visits and change in pSTAT4 levels pre-and post-  
370 probiotic use in a 1-year period. The results present pSTAT4 levels as a percentage change, and

371 the outpatient data reflect the difference in visit frequency. Our analysis underscored a positive  
372 correlation between the frequency of patients' post-surgical visits and the pSTAT4  
373 phosphorylation in their CD4 T cells (Figure 10).

374

## 375 **Discussion**

376 CRS remains a nuanced pathology, both in its presentation and underlying etiologies. In this  
377 study, we started out with exploring a VUS in the IL-12 receptor beta 1 of an RCRS patient.  
378 Despite the patient's receptor expressing normally on peripheral blood T-helper cells, our  
379 discoveries highlighted a compromised IL-12 signaling. Even though there is a correlation in the  
380 patient's family between individuals with the mutation and low pSTAT4 response we were  
381 unable to show an effect of the mutation in computational structural simulation models or by *in*  
382 *vitro* transfection experiments.

383

384 Broadening our scope, we undertook a validated pSTAT4 assay across an expansive cohort of  
385 RCRS patients. The outcome was illuminating; diminished STAT4 phosphorylation in CD4 T-  
386 cells heralded poor post-surgical recoveries. While this finding seemed to be a validation of prior  
387 research emphasizing T-cells' pivotal roles in RCRS, it also accentuated a conspicuous gap in  
388 clinical practice: the lack of routine cellular immunity assessments of these patients, despite their  
389 potential diagnostic importance. The common practice of immune evaluation of CRS involves  
390 measuring serum quantitative antibody levels, which, more often than not, provide inconclusive  
391 results [25,40,41]. As this research underscores specific defects in T cell function and offers a  
392 clinically validated diagnostic tool, we anticipate a paradigm shift towards more tailored  
393 therapeutic approaches for RCRS. However, unveiling the exact mechanics behind impaired IL-

394 12-mediated STAT4 phosphorylation remains to be determined, the deciphering of which could  
395 usher in therapeutic breakthroughs.

396  
397 Another riveting aspect of our study revolves around the interplay between *Lactobacillus* species  
398 and the immune system. With their presence predominantly in the human gut, *Lactobacillus*  
399 species' interactions with macrophages can influence cytokine profiles, including IL-12 [42]. We  
400 confirmed this in our *in vitro* analysis using neutralizing IL-12 antibodies which reduced the  
401 effect of *L. acidophilus*. Furthermore, the *L. acidophilus* was able to induce STAT4  
402 phosphorylation in the absence of any exogenous IL-12. But not all *Lactobacilli* are created  
403 equal. Potentially, strain-specific variability can exist in their potency to modulate IL-12,  
404 potentially attributed to differences in their cell walls [43]. This study further delves into this  
405 variability, reinforcing the importance of strategic *Lactobacillus* selection in potential therapeutic  
406 endeavors. The precise mechanism of *Lactobacillus* stimulation of T cells is not entirely known  
407 and our data shows both IL-12 independent as well as dependent phosphorylation of STAT4.  
408 The STAT4 phosphorylation we observe in Figure 9A is lower than what we see when saturating  
409 the blood sample with IL-12, but it is likely to be adequate, *in vivo*, to activate and poise the Th-1  
410 cells in patients with low pSTAT4 response and lead to improved clinical outcomes in  
411 postsurgical RCRS patients.

412  
413 Our *Lactobacillus* data provide important insights into the inconsistent findings in the literature  
414 concerning the clinical effects of *Lactobacillus* on Chronic Rhinosinusitis (CRS) outcomes. The  
415 data highlight two key factors: Firstly, the specific strains of probiotics and individual host  
416 characteristics significantly influence STAT4 phosphorylation. This effect's strength and its IL-

417 12 dependence vary, as evidenced by the inhibition assays presented in Figure 5 and  
418 Supplementary Figure 8. Future research should identify the probiotic structural components  
419 responsible for these effects. Secondly, the choice of clinical endpoints is crucial. Given that  
420 STAT4 phosphorylation is pivotal in regulating Th1 cell responses, our research prioritized post-  
421 surgical wound healing rather than improvements in clinical symptoms or reductions in sinus  
422 infection rates. [44–46]. The process of wound healing begins with an immediate inflammatory  
423 response, seeing an influx of various cellular actors. Th1 cells, through their influence on  
424 macrophages and fibroblasts and their production of IFN- $\gamma$ , impact collagen synthesis, the  
425 bedrock of tissue repair [47]. However, maintaining a balance in Th1 activity is paramount. An  
426 overwhelming or inadequate Th1 response can either prolong inflammation or inadequately  
427 support the initial healing phases, respectively. As such, understanding Th1 activity, primarily  
428 via STAT4 phosphorylation, provides invaluable insights into predicting and optimizing surgical  
429 outcomes. Furthermore, the microbiota can induce an adaptive immune response that can couple  
430 antimicrobial function with tissue repair and wound healing [48]. It has been shown that non-  
431 classical MHC class I molecules, an evolutionarily ancient arm of the immune system, can  
432 promote immunity to the microbiota, such as *Lactobacillus*, and subsequently affect cytokine  
433 signaling, including IL-12 [49]. To enhance our understanding of Recurrent Chronic  
434 Rhinosinusitis (RCRS), it is crucial to conduct prospective studies focusing on the IL-12  
435 pathway. Investigating its specific functions could provide insights into its dual role in infection  
436 control and inflammation regulation.

437

438 A limitation of our study is that it was not designed prospectively, and it depended on the  
439 analysis of retrospective review of patient charts. To further corroborate our clinical findings,  
440 future studies should be prospective, randomized, and placebo controlled.

441  
442 Finally, our research underscores the critical role of Laboratory Developed Tests (LDTs) in  
443 enhancing clinical diagnostics and patient care, with a special focus on the pSTAT4 assay as an  
444 example. Unlike test kits cleared by the Food and Drug Administration (FDA), LDTs bridge the  
445 gap in diagnosing complex or rare conditions. Their ability to rapidly integrate cutting-edge  
446 diagnostic methods makes them an essential tool in the dynamic healthcare environment,  
447 especially when leveraged by skilled clinicians. The pSTAT4 test, in particular, has shown  
448 promise as a predictor of outcomes following sinus surgeries, potentially revolutionizing the  
449 management strategies for RCRS. Given these findings, there is a compelling case for the  
450 broader adoption of LDTs like pSTAT4 in clinical settings and a call for more research to further  
451 establish their utility and impact on patient care trajectories.

452

## 453 **Conclusion**

454 As our grasp of RCRS and its complex underlying mechanisms grows, evaluating T-cell defects  
455 using the STAT4 phosphorylation assay described in this study emerges as a particularly  
456 promising avenue. These innovative diagnostic and therapeutic strategies that evolve from them,  
457 have the potential to transform our management of CRS. When utilized with precision, they offer  
458 a path toward alleviating the substantial strain that CRS places on healthcare systems.

459

## 460 **References**

- 461 [1] Rosenzweig SD, Holland SM. Defects in the interferon-gamma and interleukin-12 pathways.  
462 *Immunol Rev* 2005;203:38–47. <https://doi.org/10.1111/j.0105-2896.2005.00227.x>.
- 463 [2] Kobayashi M, Fitz L, Ryan M, Hewick RM, Clark SC, Chan S, et al. Identification and purification  
464 of natural killer cell stimulatory factor (NKSF), a cytokine with multiple biologic effects on human  
465 lymphocytes. *J Exp Med* 1989;170:827–45. <https://doi.org/10.1084/jem.170.3.827>.
- 466 [3] Gee K, Guzzo C, Che Mat NF, Ma W, Kumar A. The IL-12 family of cytokines in infection,  
467 inflammation and autoimmune disorders. *Inflamm Allergy Drug Targets* 2009;8:40–52.  
468 <https://doi.org/10.2174/187152809787582507>.
- 469 [4] Malmgaard L. Induction and regulation of IFNs during viral infections. *J Interferon Cytokine Res*  
470 2004;24:439–54. <https://doi.org/10.1089/1079990041689665>.
- 471 [5] Morinobu A, Gadina M, Strober W, Visconti R, Fornace A, Montagna C, et al. STAT4 serine  
472 phosphorylation is critical for IL-12-induced IFN- $\gamma$  production but not for cell proliferation. *Proc*  
473 *Natl Acad Sci USA* 2002;99:12281–6. <https://doi.org/10.1073/pnas.182618999>.
- 474 [6] Presky DH, Yang H, Minetti LJ, Chua AO, Nabavi N, Wu C-Y, et al. A functional interleukin 12  
475 receptor complex is composed of two  $\beta$ -type cytokine receptor subunits. *Proc Natl Acad Sci USA*  
476 1996;93:14002–7. <https://doi.org/10.1073/pnas.93.24.14002>.
- 477 [7] De Beaucoudrey L, Samarina A, Bustamante J, Cobat A, Boisson-Dupuis S, Feinberg J, et al.  
478 Revisiting Human IL-12R $\beta$ 1 Deficiency: A Survey of 141 Patients From 30 Countries. *Medicine*  
479 2010;89:381–402. <https://doi.org/10.1097/MD.0b013e3181fdd832>.
- 480 [8] Van De Vosse E, Haverkamp MH, Ramirez-Alejo N, Martinez-Gallo M, Blancas-Galicia L, Metin  
481 A, et al. IL-12R $\beta$ 1 Deficiency: Mutation Update and Description of the *IL12RB1* Variation  
482 Database. *Human Mutation* 2013;34:1329–39. <https://doi.org/10.1002/humu.22380>.
- 483 [9] Fieschi C, Dupuis S, Catherinot E, Feinberg J, Bustamante J, Breiman A, et al. Low Penetrance,  
484 Broad Resistance, and Favorable Outcome of Interleukin 12 Receptor  $\beta$ 1 Deficiency. *The Journal of*  
485 *Experimental Medicine* 2003;197:527–35. <https://doi.org/10.1084/jem.20021769>.
- 486 [10] Rosain J, Oleaga-Quintas C, Deswarte C, Verdin H, Marot S, Syridou G, et al. A Variety of Alu-  
487 Mediated Copy Number Variations Can Underlie IL-12R $\beta$ 1 Deficiency. *J Clin Immunol*  
488 2018;38:617–27. <https://doi.org/10.1007/s10875-018-0527-6>.
- 489 [11] Bustamante J, Boisson-Dupuis S, Abel L, Casanova J-L. Mendelian susceptibility to mycobacterial  
490 disease: Genetic, immunological, and clinical features of inborn errors of IFN- $\gamma$  immunity. *Seminars*  
491 *in Immunology* 2014;26:454–70. <https://doi.org/10.1016/j.smim.2014.09.008>.
- 492 [12] Cleary AM, Tu W, Enright A, Giffon T, Dewaal-Malefy R, Gutierrez K, et al. Impaired  
493 Accumulation and Function of Memory CD4 T Cells in Human IL-12 Receptor  $\beta$ 1 Deficiency. *The*  
494 *Journal of Immunology* 2003;170:597–603. <https://doi.org/10.4049/jimmunol.170.1.597>.
- 495 [13] Jacobson NG, Szabo SJ, Güler ML, Gorham JD, Murphy KM. Regulation of interleukin-12  
496 signalling during T helper phenotype development. *Adv Exp Med Biol* 1996;409:61–73.  
497 [https://doi.org/10.1007/978-1-4615-5855-2\\_9](https://doi.org/10.1007/978-1-4615-5855-2_9).
- 498 [14] Smith A, Buchinsky FJ, Post JC. Eradicating chronic ear, nose, and throat infections: a  
499 systematically conducted literature review of advances in biofilm treatment. *Otolaryngol Head Neck*  
500 *Surg* 2011;144:338–47. <https://doi.org/10.1177/0194599810391620>.
- 501 [15] Lee VS. Topical Irrigations for Chronic Rhinosinusitis. *Immunol Allergy Clin North Am*  
502 2020;40:317–28. <https://doi.org/10.1016/j.iac.2019.12.014>.
- 503 [16] Czibulka A. Probiotics for Otolaryngologic Disorders. *Otolaryngol Clin North Am* 2022;55:939–46.  
504 <https://doi.org/10.1016/j.otc.2022.06.003>.
- 505 [17] Psaltis AJ, Mackenzie BW, Cope EK, Ramakrishnan VR. Unraveling the role of the microbiome in  
506 chronic rhinosinusitis. *J Allergy Clin Immunol* 2022;149:1513–21.  
507 <https://doi.org/10.1016/j.jaci.2022.02.022>.
- 508 [18] Bourdillon AT, Edwards HA. Review of probiotic use in otolaryngology. *Am J Otolaryngol*  
509 2021;42:102883. <https://doi.org/10.1016/j.amjoto.2020.102883>.
- 510 [19] Cervin AU. The Potential for Topical Probiotic Treatment of Chronic Rhinosinusitis, a Personal  
511 Perspective. *Front Cell Infect Microbiol* 2017;7:530. <https://doi.org/10.3389/fcimb.2017.00530>.

- 512 [20] Holubar SD, Cima RR, Sandborn WJ, Pardi DS. Treatment and prevention of pouchitis after ileal  
513 pouch-anal anastomosis for chronic ulcerative colitis. *Cochrane Database Syst Rev*  
514 2010;CD001176. <https://doi.org/10.1002/14651858.CD001176.pub2>.
- 515 [21] Yazdi MH, Soltan Dallal MM, Hassan ZM, Holakuyee M, Agha Amiri S, Abolhassani M, et al.  
516 Oral administration of *Lactobacillus acidophilus* induces IL-12 production in spleen cell culture of  
517 BALB/c mice bearing transplanted breast tumour. *Br J Nutr* 2010;104:227–32.  
518 <https://doi.org/10.1017/S0007114510000516>.
- 519 [22] Shida K, Kiyoshima-Shibata J, Kaji R, Nagaoka M, Nanno M. Peptidoglycan from lactobacilli  
520 inhibits interleukin-12 production by macrophages induced by *Lactobacillus casei* through Toll-like  
521 receptor 2-dependent and independent mechanisms. *Immunology* 2009;128:e858-869.  
522 <https://doi.org/10.1111/j.1365-2567.2009.03095.x>.
- 523 [23] Shida K, Kiyoshima-Shibata J, Nagaoka M, Watanabe K, Nanno M. Induction of interleukin-12 by  
524 *Lactobacillus* strains having a rigid cell wall resistant to intracellular digestion. *J Dairy Sci*  
525 2006;89:3306–17. [https://doi.org/10.3168/jds.S0022-0302\(06\)72367-0](https://doi.org/10.3168/jds.S0022-0302(06)72367-0).
- 526 [24] Desrosiers M. Refractory chronic rhinosinusitis: pathophysiology and management of chronic  
527 rhinosinusitis persisting after endoscopic sinus surgery. *Curr Allergy Asthma Rep* 2004;4:200–7.  
528 <https://doi.org/10.1007/s11882-004-0027-z>.
- 529 [25] Rosenfeld RM, Piccirillo JF, Chandrasekhar SS, Brook I, Ashok Kumar K, Kramper M, et al.  
530 Clinical practice guideline (update): adult sinusitis. *Otolaryngol Head Neck Surg* 2015;152:S1–39.  
531 <https://doi.org/10.1177/0194599815572097>.
- 532 [26] PSTAT Validation — Amerimmune n.d. <https://www.amerimmune.com/pstat-validation> (accessed  
533 October 17, 2023).
- 534 [27] Ryherd M, Plassmeyer M, Alexander C, Eugenio I, Kleschenko Y, Badger A, et al. Improved panels  
535 for clinical immune phenotyping: Utilization of the violet laser. *Cytometry B Clin Cytom*  
536 2018;94:671–9. <https://doi.org/10.1002/cyto.b.21532>.
- 537 [28] Jumper J, Evans R, Pritzel A, Green T, Figurnov M, Ronneberger O, et al. Highly accurate protein  
538 structure prediction with AlphaFold. *Nature* 2021;596:583–9. [https://doi.org/10.1038/s41586-021-](https://doi.org/10.1038/s41586-021-03819-2)  
539 03819-2.
- 540 [29] Pettersen EF, Goddard TD, Huang CC, Meng EC, Couch GS, Croll TI, et al. UCSF CHIMERA<sup>2</sup>:  
541 Structure visualization for researchers, educators, and developers. *Protein Science* 2021;30:70–82.  
542 <https://doi.org/10.1002/pro.3943>.
- 543 [30] Dogan M, Kozhaya L, Placek L, Karabacak F, Yigit M, Unutmaz D. Targeting SARS-CoV-2  
544 infection through CAR-T-like bispecific T cell engagers incorporating ACE2. *Clin & Trans*  
545 *Imm* 2022;11:e1421. <https://doi.org/10.1002/cti2.1421>.
- 546 [31] Dogan M, Karhan E, Kozhaya L, Placek L, Chen X, Yigit M, et al. Engineering Human MAIT Cells  
547 with Chimeric Antigen Receptors for Cancer Immunotherapy. *The Journal of Immunology*  
548 2022;209:1523–31. <https://doi.org/10.4049/jimmunol.2100856>.
- 549 [32] VCV000328593.9 - ClinVar - NCBI n.d.  
550 [https://www.ncbi.nlm.nih.gov/clinvar/variation/328593/?new\\_evidence=true](https://www.ncbi.nlm.nih.gov/clinvar/variation/328593/?new_evidence=true) (accessed October 1,  
551 2023).
- 552 [33] Cho D-Y, Hunter RC, Ramakrishnan VR. The Microbiome and Chronic Rhinosinusitis. *Immunol*  
553 *Allergy Clin North Am* 2020;40:251–63. <https://doi.org/10.1016/j.iac.2019.12.009>.
- 554 [34] Säemann MD, Parolini O, Böhmig GA, Kelemen P, Krieger P-M, Neumüller J, et al. Bacterial  
555 metabolite interference with maturation of human monocyte-derived dendritic cells. *J Leukoc Biol*  
556 2002;71:238–46.
- 557 [35] Sogkas G, Atschekzei F, Schacht V, Von Falck C, Jablonka A, Jacobs R, et al. First Association of  
558 Interleukin 12 Receptor Beta 1 Deficiency with Sjögren’s Syndrome. *Front Immunol* 2017;8:885.  
559 <https://doi.org/10.3389/fimmu.2017.00885>.
- 560 [36] Uzel G, Frucht DM, Fleisher TA, Holland SM. Detection of Intracellular Phosphorylated STAT-4  
561 by Flow Cytometry. *Clinical Immunology* 2001;100:270–6. <https://doi.org/10.1006/clim.2001.5078>.

- 562 [37] Fieschi C. A novel form of complete IL-12/IL-23 receptor 1 deficiency with cell surface-expressed  
563 nonfunctional receptors. *Blood* 2004;104:2095–101. <https://doi.org/10.1182/blood-2004-02-0584>.
- 564 [38] Hamilos DL. Host-microbial interactions in patients with chronic rhinosinusitis. *Journal of Allergy  
565 and Clinical Immunology* 2013;131:1263-1264.e6. <https://doi.org/10.1016/j.jaci.2013.02.020>.
- 566 [39] Chung K-S, Choi JW, Shin J-S, Kim S-Y, Han H-S, Kim S-Y, et al. Strain-Specific Identification  
567 and In Vivo Immunomodulatory Activity of Heat-Killed *Lactobacillus sakei* K040706. *Foods*  
568 2021;10:3034. <https://doi.org/10.3390/foods10123034>.
- 569 [40] Chiarella SE, Grammer LC. Immune deficiency in chronic rhinosinusitis: screening and treatment.  
570 *Expert Rev Clin Immunol* 2017;13:117–23. <https://doi.org/10.1080/1744666X.2016.1216790>.
- 571 [41] Alpan O, Loizou D, Santos I, Ness B, Plandowski J. Impact of immune work-up on outcomes and  
572 the cost of care in patients with Chronic Rhinosinusitis. *Allergy* 2019;74:1802–5.  
573 <https://doi.org/10.1111/all.13793>.
- 574 [42] Quinteiro-Filho WM, Brisbin JT, Hodgins DC, Sharif S. *Lactobacillus* and *Lactobacillus* cell-free  
575 culture supernatants modulate chicken macrophage activities. *Res Vet Sci* 2015;103:170–5.  
576 <https://doi.org/10.1016/j.rvsc.2015.10.005>.
- 577 [43] Rocha-Ramírez LM, Pérez-Solano RA, Castañón-Alonso SL, Moreno Guerrero SS, Ramírez  
578 Pacheco A, García Garibay M, et al. Probiotic *Lactobacillus* Strains Stimulate the Inflammatory  
579 Response and Activate Human Macrophages. *J Immunol Res* 2017;2017:4607491.  
580 <https://doi.org/10.1155/2017/4607491>.
- 581 [44] Ellis S, Lin EJ, Tartar D. Immunology of Wound Healing. *Curr Derm Rep* 2018;7:350–8.  
582 <https://doi.org/10.1007/s13671-018-0234-9>.
- 583 [45] Eming SA, Krieg T, Davidson JM. Inflammation in Wound Repair: Molecular and Cellular  
584 Mechanisms. *Journal of Investigative Dermatology* 2007;127:514–25.  
585 <https://doi.org/10.1038/sj.jid.5700701>.
- 586 [46] Raziyeva K, Kim Y, Zharkinbekov Z, Kassymbek K, Jimi S, Saparov A. Immunology of Acute and  
587 Chronic Wound Healing. *Biomolecules* 2021;11:700. <https://doi.org/10.3390/biom11050700>.
- 588 [47] Dumitru C, Kabat AM, Maloy KJ. Metabolic Adaptations of CD4+ T Cells in Inflammatory  
589 Disease. *Front Immunol* 2018;9:540. <https://doi.org/10.3389/fimmu.2018.00540>.
- 590 [48] Linehan JL, Harrison OJ, Han S-J, Byrd AL, Vujkovic-Cvijin I, Villarino AV, et al. Non-classical  
591 Immunity Controls Microbiota Impact on Skin Immunity and Tissue Repair. *Cell* 2018;172:784-  
592 796.e18. <https://doi.org/10.1016/j.cell.2017.12.033>.
- 593 [49] Vemuri R, Gundamaraju R, Shinde T, Perera AP, Basheer W, Southam B, et al. *Lactobacillus*  
594 *acidophilus* DDS-1 Modulates Intestinal-Specific Microbiota, Short-Chain Fatty Acid and  
595 Immunological Profiles in Aging Mice. *Nutrients* 2019;11:1297.  
596 <https://doi.org/10.3390/nu11061297>.
- 597

598

## 599 **Figure legends:**

### 600 **Figure 1**

601 Characterizing of the patient. A) Endoscopic photograph of the patient's sinus. B) Sanger

602 sequencing of the *IL12Rb1* gene. C) Pedigree of the patient and her family. D) CD212

603 (IL12Rβ1) expression on CD4 and CD20 lymphocytes.



604

605 **Figure 2**

606 Stimulation of PBMC with PMA and ionomycin. The percentages of CD3<sup>+</sup>/CD4<sup>+</sup> lymphocytes  
607 that produces IL-17 (normal range 0.2%-2.2%) and IFN $\gamma$  (normal range 3-30%) were determined  
608 by flow cytometry.

609

610 **Figure 3**

611 The mutation affects IL-12 signaling. PBMC stimulated with IL-12, IL-18, IL-2 and  
612 CD3&CD28 beads. The IFN $\gamma$  production were measured in CD3<sup>+</sup>/CD4<sup>+</sup> lymphocytes. The  
613 experiment was repeated three times. Representative plots are shown.

614

615 **Figure 4**

616 STAT4 phosphorylation in response to IL-12 stimulation. A) representative plots. B) Results  
617 from the patient, healthy controls and CVID patients. C) Four of the patient's children. "+"  
618 indicates wt allele and "-" indicates the mutation.

619

620 **Figure 5**

621 Effect of IL12R $\beta$ 1 expression on IL-12 induced STAT4 phosphorylation in Jurkat cells.  
622 Histograms overlay representing pStat4 after stimulation of wild type or engineered Jurkat cells  
623 with wt IL12R $\beta$ 2, wt IL12R $\beta$ 1 or both receptors.

624

625 **Figure 6**

626 IL12Rb1 and IL12Rb2 engineered Jurkat cells. A) Expression analyzed by flow cytometry of  
627 IL12Rb2 and IL12Rb1. B) Comparison of percent phosphorylated STAT4 expression in  
628 engineered Jurkat cells expressing wild-type or mutant IL12Rb1 with or without IL12Rb2.

629

630 **Figure 7**

631 STAT4 phosphorylation in Jurkat clones expressing different levels of IL-12Rb1. A) STAT4  
632 phosphorylation after IL-12 stimulation. B) IL12Rb1 expression levels.

633

634 **Figure 8**

635 Percent pSTAT4 positive cells after IL-12 stimulation of whole blood from CRS patients and  
636 healthy controls.

637

638 **Figure 9**

639 *In vitro* effects of lactobacilli on STAT4 phosphorylation. A) The percentage of  
640 pSTAT4/CD45RO cells for the different conditions indicated in the figure. B) Effect of IL-12  
641 neutralizing antibodies on lactobacilli induced STAT4 phosphorylated.

642

643 **Figure 10**

644 Lactobacilli in post-surgery setting. Patient data on the total number of outpatient visits for one  
645 year following surgery and pSTAT4 levels before and approximately six months after *L. sakei*  
646 treatments.

647

# Figure 1

A

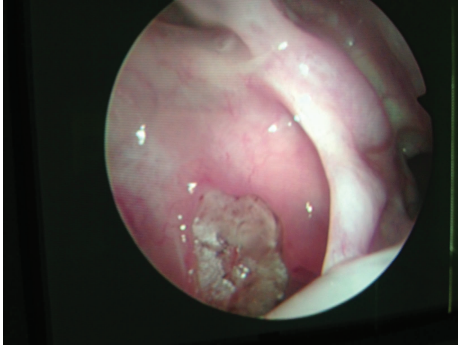

B

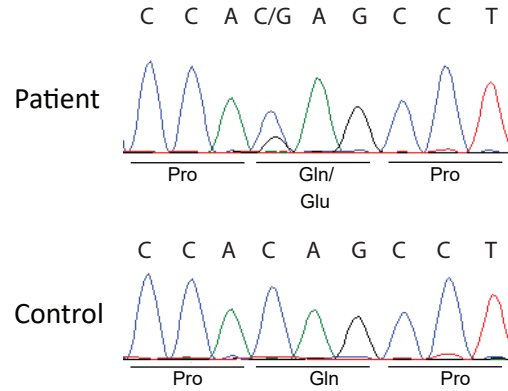

C

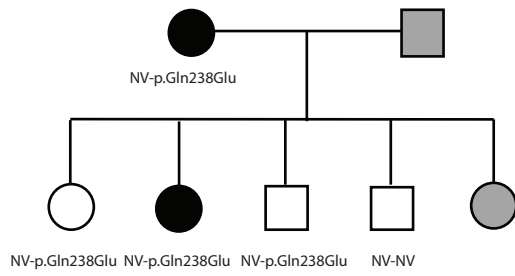

D

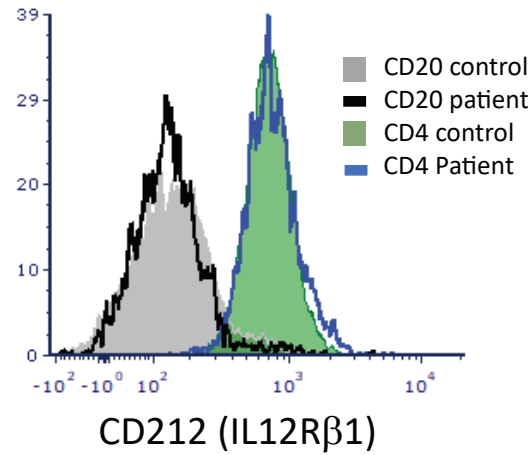

## Figure 2

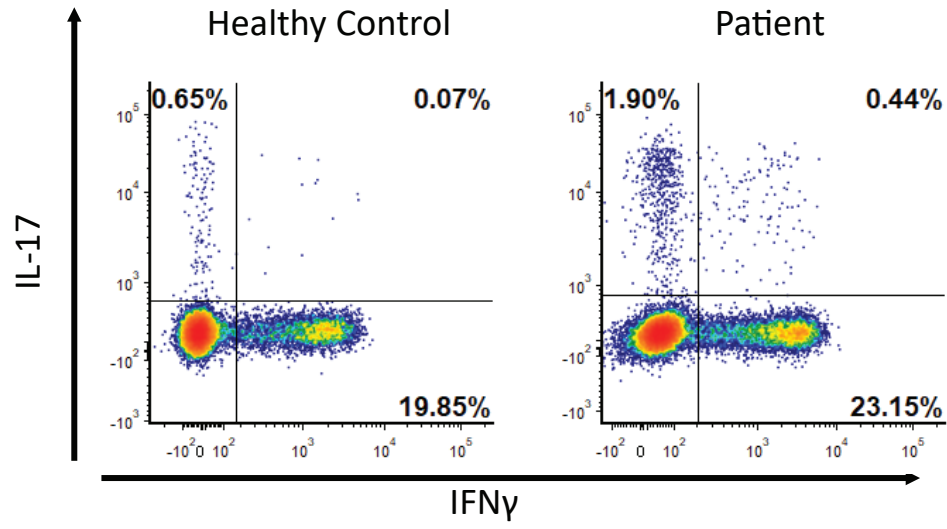

# Figure 3

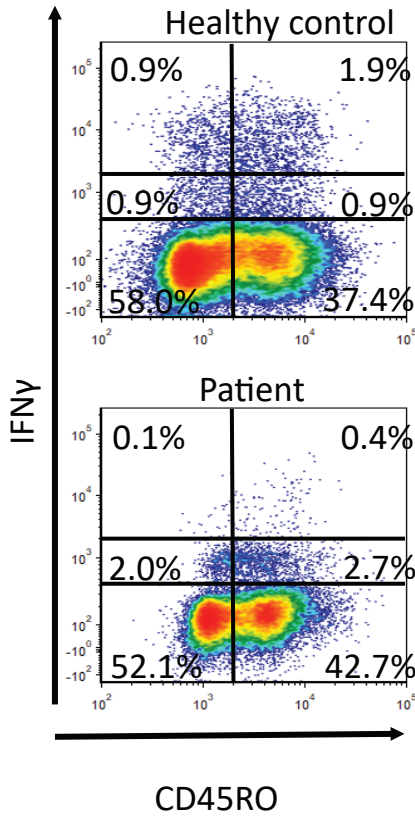

# Figure 4

A

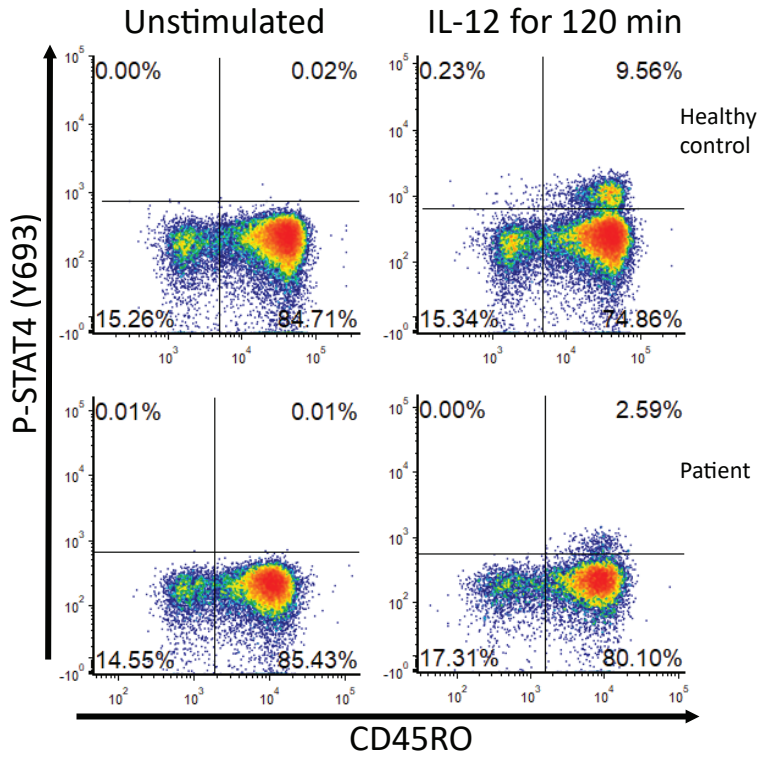

B

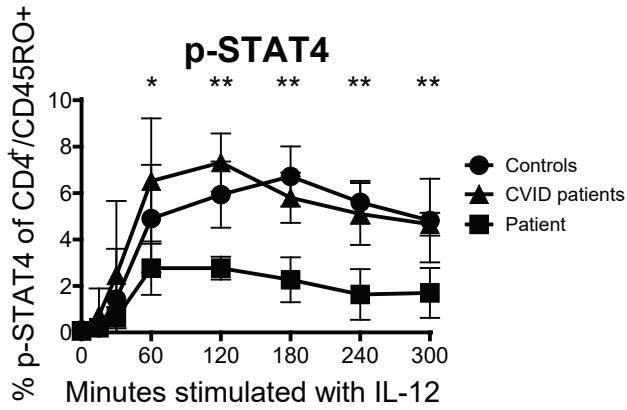

C

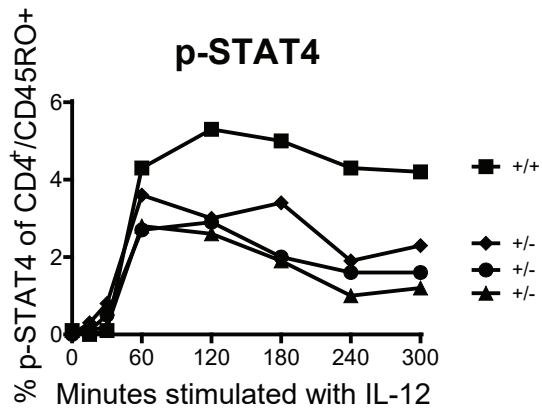

# Figure 5

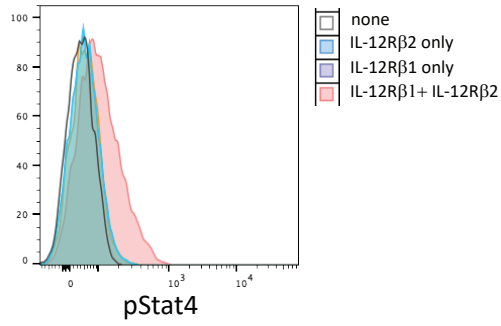

# Figure 6

A

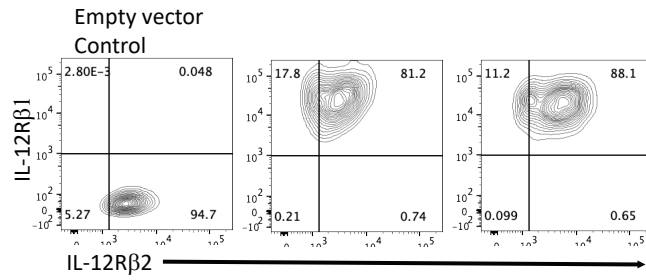

B

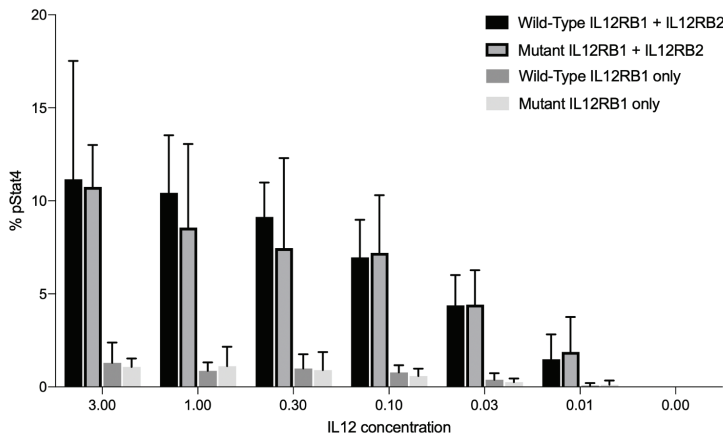



# Figure 7

A

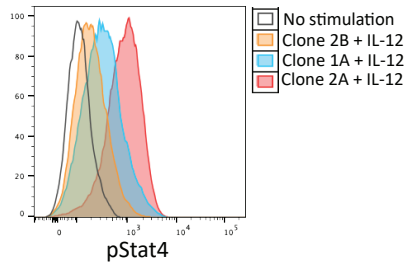

B

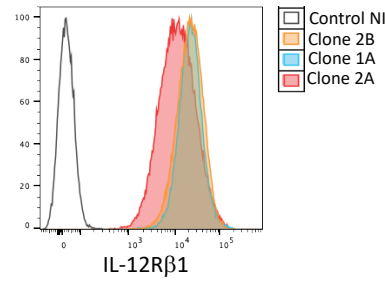

# Figure 8

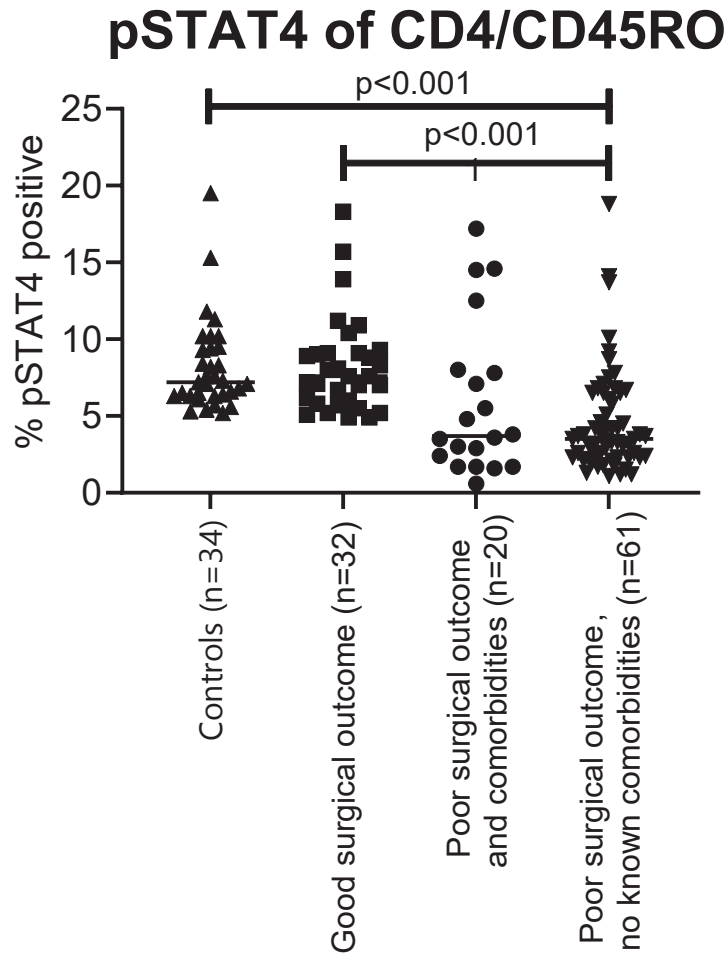

## Figure 9

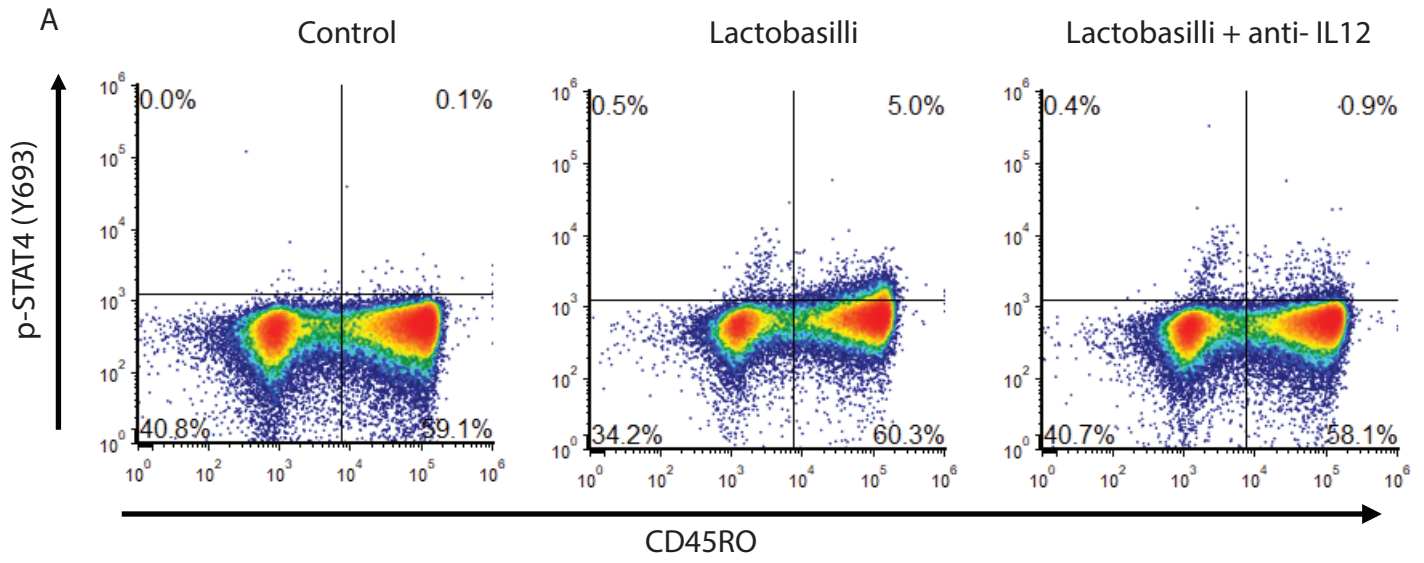

**B** Reduction in lactobacilli induced STAT4 phosphorylation by  $\alpha$ IL-12

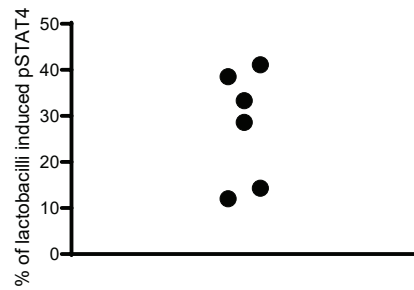

# Figure 10

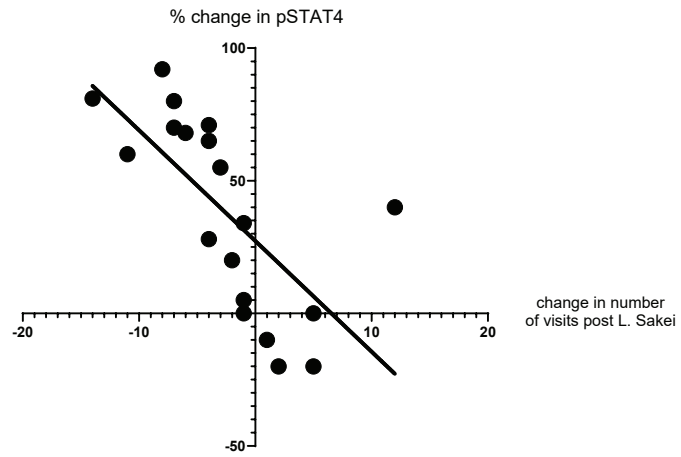

Source: https://medrxiv.org/content/10.1101/2023.12.11.23299743.full.pdf
